# Supplementary material for: TGF-β-dependent lymphoid tissue residency of stem-like T cells limits response to tumor vaccine
Source: PubMed Central journal article supplement (PMC9562983; doi:10.1038/s41467-022-33768-x), 2022-10-13
Supplement: 41467_2022_33768_MOESM1_ESM.pdf [file 41467_2022_33768_MOESM1_ESM.pdf]

## Supplementary Information

### TGF- $\beta$ -dependent Lymphoid Tissue Residency of Stem-like T cells Limits Response to Tumor Vaccine

Guo Li<sup>1,2,3,4</sup>, Saranya Srinivasan<sup>1#</sup>, Liwen Wang<sup>1,5#</sup>, Chaoyu Ma<sup>1</sup>, Kai Guo<sup>2,9</sup>, Wenhao  
Xiao<sup>2</sup>, Wei Liao<sup>1,6,10</sup>, Shruti Mishra<sup>1,11</sup>, Xin Zhang<sup>2,3,4,7</sup>, Yuanzheng Qiu<sup>2,3,4,7</sup>, Qianjin  
Lu<sup>6,8</sup>, Yong Liu<sup>2,3,4,7\*</sup> and Nu Zhang<sup>1\*</sup>

## Supplementary Figures

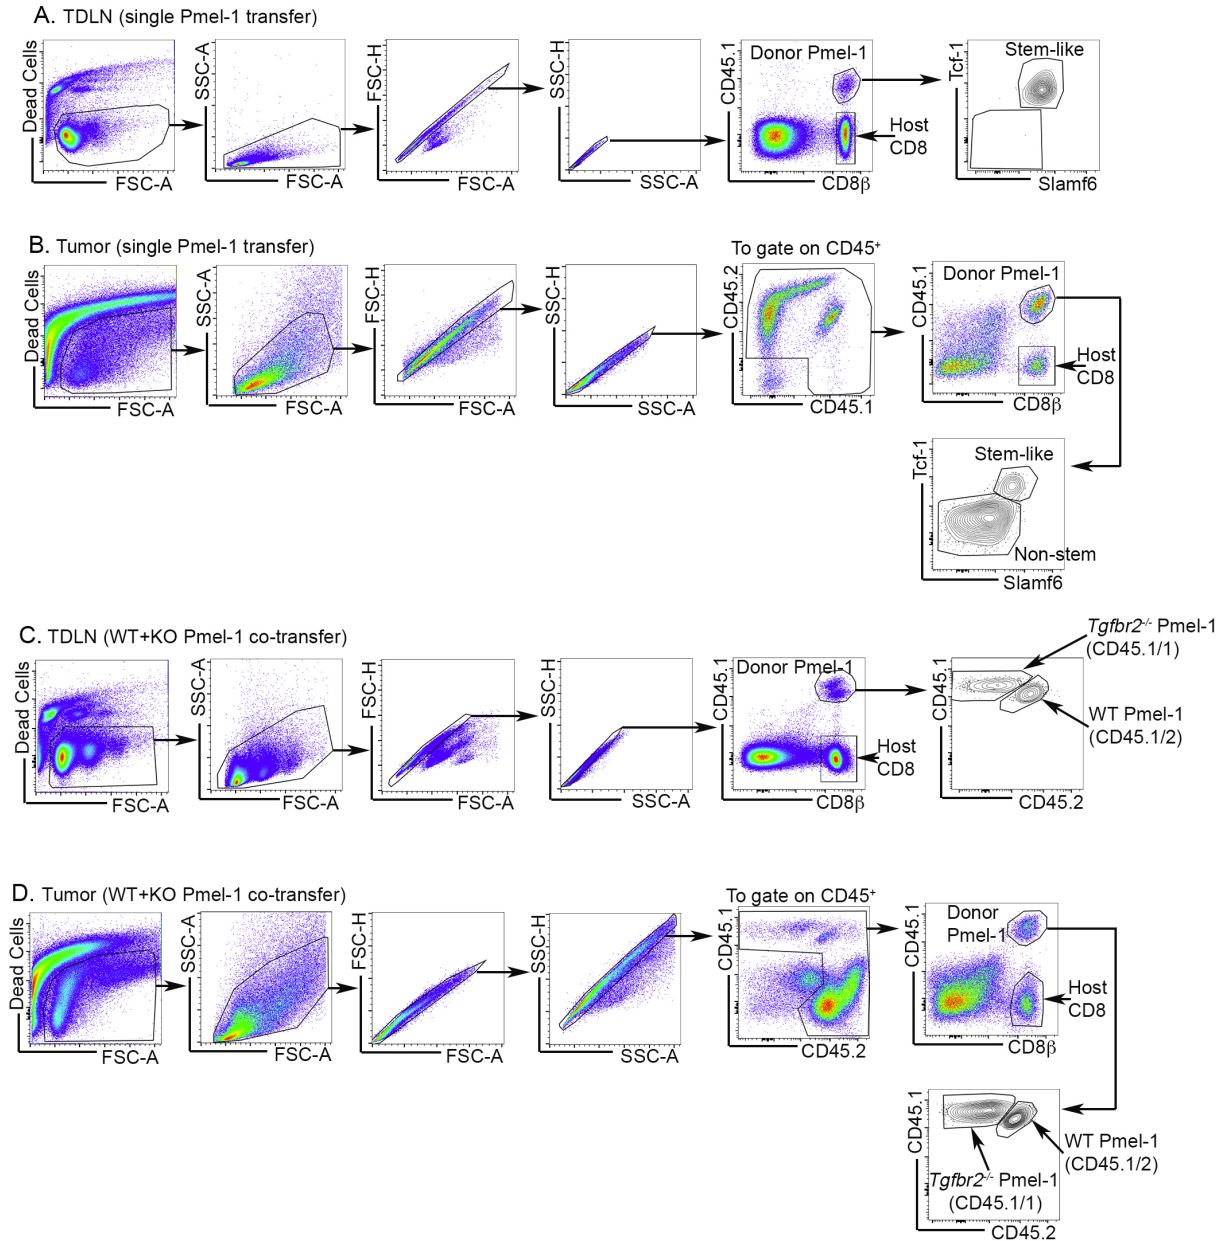

**Supplementary Figure 1. FACS gating strategies.** For single Pmel-1 donor T cell transfer experiments, gating strategies for TDLN (**A**, used in Fig. 3, 4, 5, 8, S2, S3, S4 and S7) and tumor (**B**, used in Fig. 2, 3, 4, 8, S2, S3 and S7) are shown. For WT (wild type) and *Tgfr2*<sup>-/-</sup> Pmel-1 co-transfer experiments, gating strategies for TDLN (**C**, used in Fig. 5, 6, 7, S5 and S6) and tumor (**D**, used in Fig. 6, 7, S5 and S6) are shown.

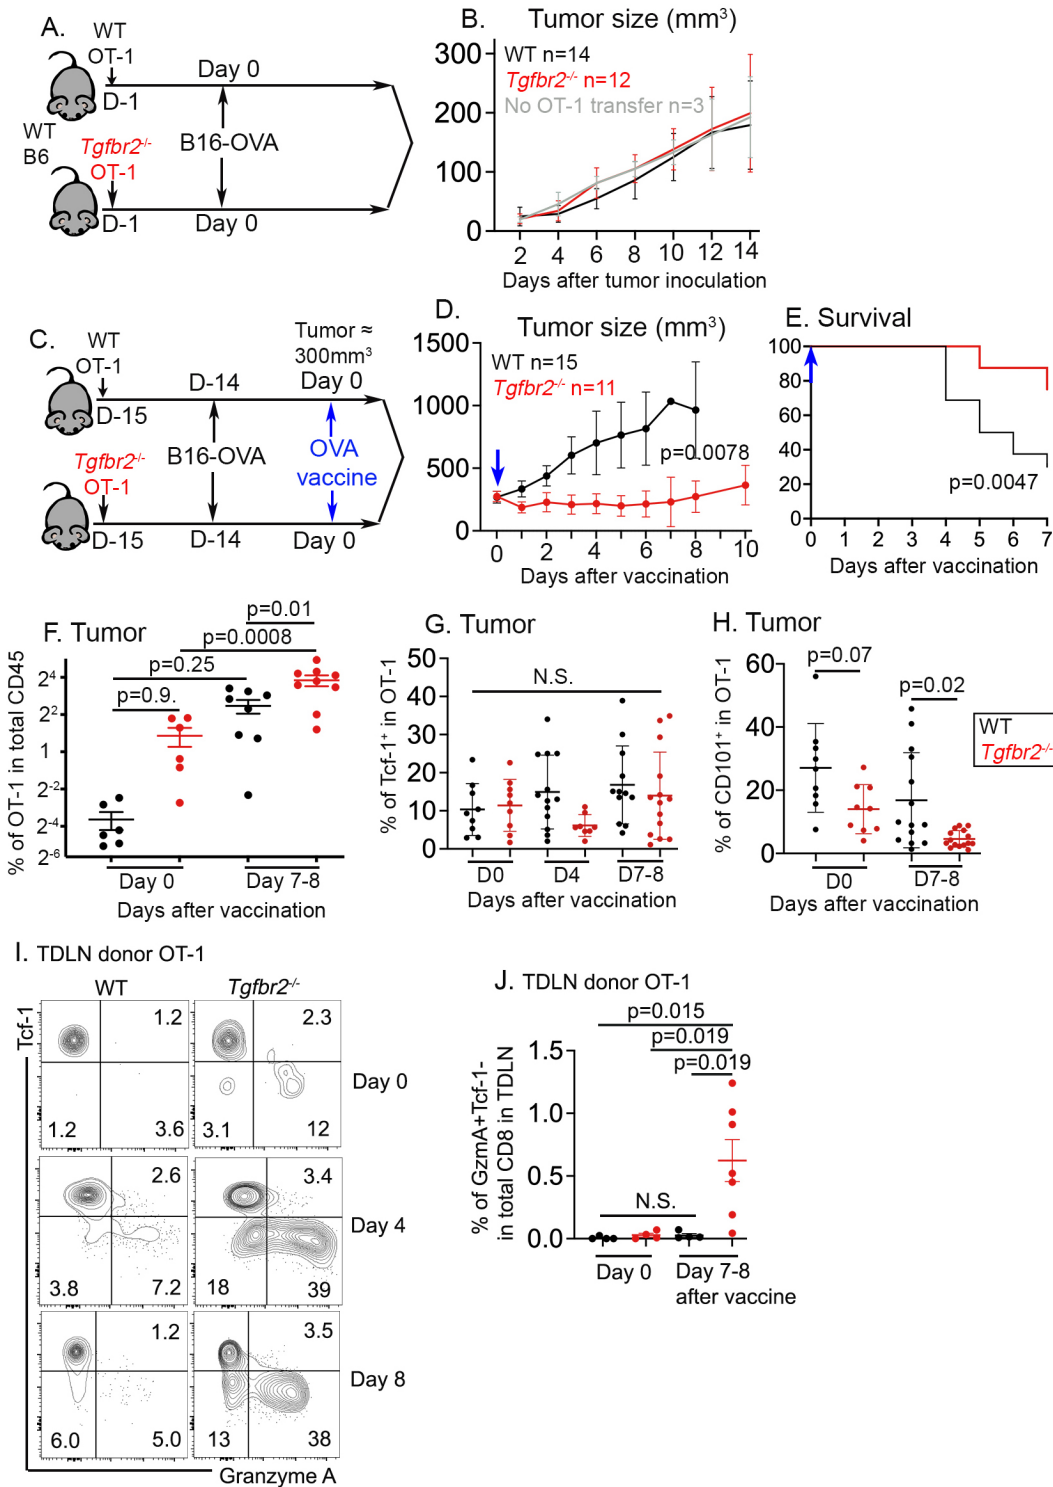

**Supplementary Figure 2. *Tgfb $\beta$ 2*<sup>-/-</sup> OT-1 T cells synergize with OVA peptide vaccination to control B16-OVA.** (A) and (B), OT-1 transfer alone or No OT-1 control in grey. (A) Schematics; (B) Tumor growth. (C) to (E), OT-1+OVA vaccine. (C) Schematics; (D) Tumor growth and (E) Survival curve after vaccination are shown. Black, WT OT-1 recipients, red, *Tgfb $\beta$ 2*<sup>-/-</sup> recipients and grey, no T cell transfer. For (D) and (E),

WT, n=15 and *Tgfb2*<sup>-/-</sup>, n=11. **(F)** The percentage of OT-1 T cells in total CD45<sup>+</sup> tumor infiltrating cells is shown (WT, n=6, *Tgfb2*<sup>-/-</sup>, n=6, WT+Vaccine, n=8 and *Tgfb2*<sup>-/-</sup>, n=9). **(G)** The percentage of Tcf-1<sup>+</sup> subset in tumor infiltrating OT-1 T cells is shown (WT d0, n=9, *Tgfb2*<sup>-/-</sup> d0, n=9, WT d4, n=13, *Tgfb2*<sup>-/-</sup> d4, n=8, WT d8, n=12 and *Tgfb2*<sup>-/-</sup> d8, n=14). **(H)** The percentage of CD101<sup>+</sup> subset in tumor infiltrating OT-1 T cells is shown (WT, n=9, *Tgfb2*<sup>-/-</sup>, n=9, WT+Vaccine, n=14 and *Tgfb2*<sup>-/-</sup>, n=15). **(I)** Representative FACS profiles of TDLN OT-1 T cells are shown (WT, n=4, *Tgfb2*<sup>-/-</sup>, n=4, WT+Vaccine, n=4 and *Tgfb2*<sup>-/-</sup>, n=7). **(J)** The percentage of granzyme A<sup>+</sup>Tcf-1<sup>-</sup> cells in TDLN OT-1 T cells are shown. Each symbol in (F to J) represents the results from an individual mouse. Black symbols, WT and red symbols, *Tgfb2*<sup>-/-</sup>. Data are presented as mean±SEM. Pooled results from 2-3 independent experiments are shown. N.S., not significant (p>0.05) and indicated p values are calculated by two tailed Wilcoxon test (D), Log-rank Mantel-Cox test (E) or Ordinary one-way ANOVA with Tukey's multi-comparison posttest (F to H, and J). Two sided tests were used. Source data are provided as a Source Data file.

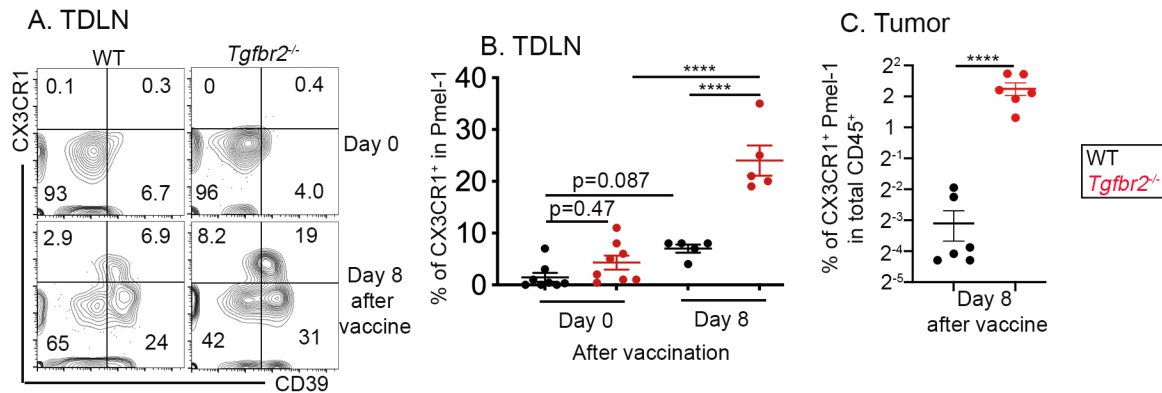

**Supplementary Figure 3. Tumor vaccine boosts the differentiation of CX3CR1<sup>+</sup> migratory effectors in TDLN and tumor.** Similar experimental setup as in Fig. 2A. (A) Representative FACS profiles of donor Pmel-1 T cells in TDLN before and after tumor vaccine are shown. (B) The percentage of CX3CR1<sup>+</sup> effectors in Pmel-1 T cells from TDLN is shown (WT, n=8, *Tgfbr2*<sup>-/-</sup>, n=8, WT+Vaccine, n=5 and *Tgfbr2*<sup>-/-</sup>, n=5). (C) The percentage of CX3CR1<sup>+</sup> Pmel-1 T cells in total CD45<sup>+</sup> tumor infiltrating cells after tumor vaccine is shown (n=6 for both WT and *Tgfbr2*<sup>-/-</sup>). Pooled results from 2 independent experiments are shown. Each symbol in (B) and (C) represents the results from an individual mouse. Black symbols, WT and red, *Tgfbr2*<sup>-/-</sup>. Data are presented as mean±SEM. Indicated p values and \*\*\*\*, p<0.0001 are calculated by Ordinary one-way ANOVA with Tukey's multi-comparison posttest (B) or two-tailed unpaired Student *t*-test (C). Two sided tests were used. Source data are provided as a Source Data file.

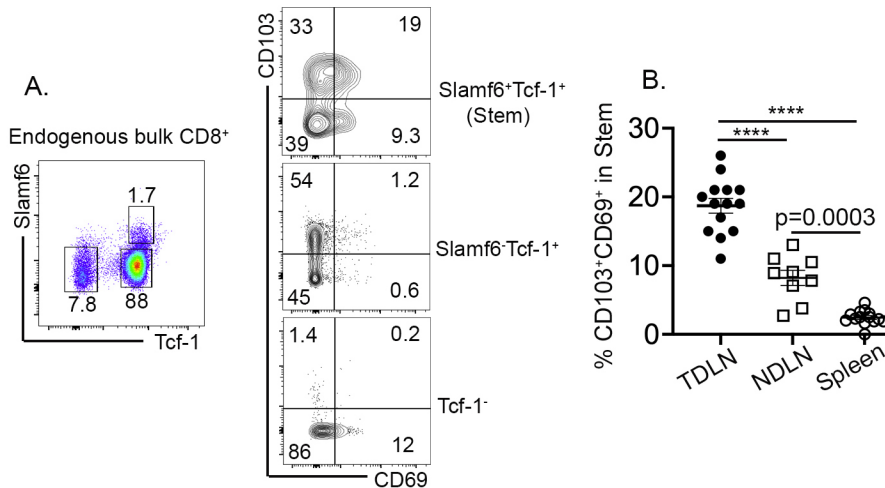

**Supplementary Figure 4. Stem-like endogenous polyclonal CD8<sup>+</sup> T cells differentiate into T<sub>RM</sub> in TDLN.** Same experimental setup as in Fig. 4a. **(A)** Left, representative gating strategy on endogenous bulk CD8<sup>+</sup> T cells isolated from TDLN; Right, representative FACS profiles of pre-gated endogenous CD8<sup>+</sup> T cells to show T<sub>RM</sub> phenotype. **(B)** The percentage of CD69<sup>+</sup>CD103<sup>+</sup> subset in endogenous stem-like CD8<sup>+</sup> T cells isolated from different lymphoid organs (TDLN, n=14, NDLN, n=9 and spleen, n=14). Data are presented as mean±SEM. Each symbol in (B) represents the results from an individual mouse. Filled circle, TDLN, empty square, NDLN and empty circle, spleen. Pooled results from 3 independent experiments are shown. Indicated *p* value and \*\*\*\*, *p*<0.0001 are calculated by Ordinary one-way ANOVA with Tukey's multi-comparison posttest. Two sided tests were used. Source data are provided as a Source Data file.

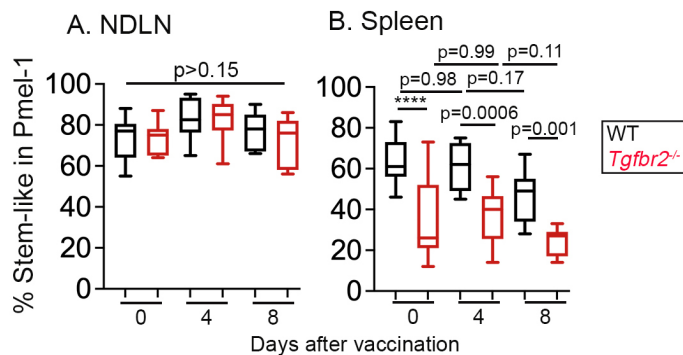

**Supplementary Figure 5. Stem-like T cell subset in other lymphoid organs after tumor vaccination.** Same experimental setup as in Fig. 7. The percentage of stem-like subset in donor Pmel-1 T cells isolated from NDLN (**A**) and spleen (**B**) at different time points after vaccination are shown. For (A), WT d0, n= 9, *Tgfr2*<sup>-/-</sup> d0, n=9, WT d4, n= 10, *Tgfr2*<sup>-/-</sup> d4, n=10, WT d8, n= 11 and *Tgfr2*<sup>-/-</sup> d8, n=11. For (B), WT d0, n= 11, *Tgfr2*<sup>-/-</sup> d0, n=11, WT d4, n= 13, *Tgfr2*<sup>-/-</sup> d4, n=13, WT d8, n= 11 and *Tgfr2*<sup>-/-</sup> d8, n=11. Data are presented as mean±SEM. Pooled results from 3 independent experiments are shown. Black, WT and red, *Tgfr2*<sup>-/-</sup>. Indicated *p* values and \*\*\*\*, *p*<0.0001 are calculated by Ordinary one-way ANOVA with Tukey's multi-comparison posttest. Two sided tests were used. Source data are provided as a Source Data file.

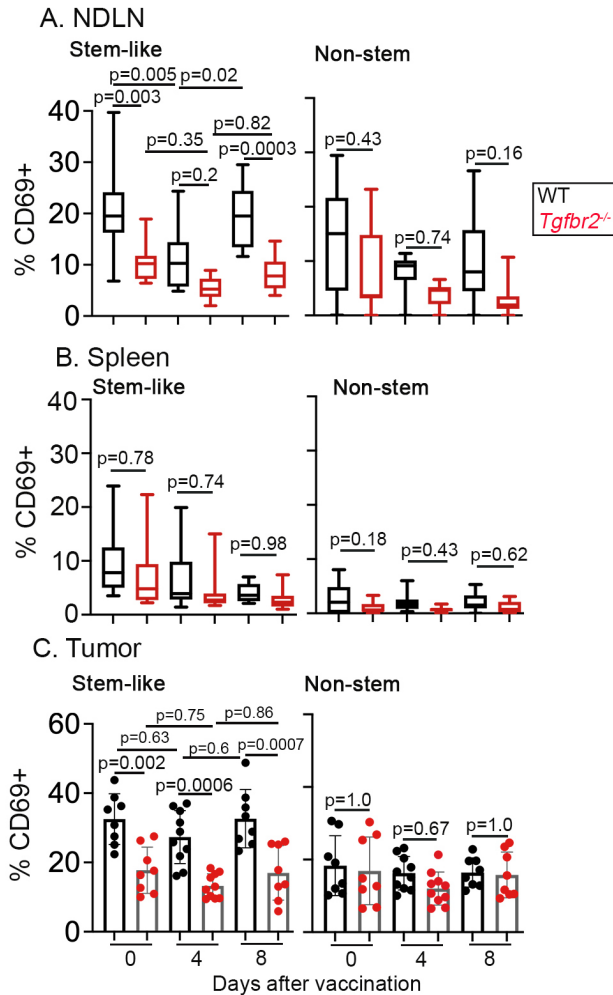

### Supplementary Figure 6. The alteration of tissue residency after tumor vaccination.

Same experimental setup as in Fig. 7. **(A)** The percentage of CD69<sup>+</sup> cells in stem-like (Left) and non-stem (Right) Pmel-1 T cells isolated from NDLN are shown. For stem-like, WT d0, n= 9, *Tgfbr2*<sup>-/-</sup> d0, n=9, WT d4, n= 10, *Tgfbr2*<sup>-/-</sup> d4, n=10, WT d8, n= 11 and *Tgfbr2*<sup>-/-</sup> d8, n=11. For non-stem, WT d0, n= 9, *Tgfbr2*<sup>-/-</sup> d0, n=9, WT d4, n= 10, *Tgfbr2*<sup>-/-</sup> d4, n=10, WT d8, n= 11 and *Tgfbr2*<sup>-/-</sup> d8, n=11. **(B)** The percentage of CD69<sup>+</sup> cells in stem-like (Left) and non-stem (Right) Pmel-1 T cells isolated from spleen are shown. For stem-like, WT d0, n= 11, *Tgfbr2*<sup>-/-</sup> d0, n=11, WT d4, n= 13, *Tgfbr2*<sup>-/-</sup> d4, n=13, WT d8, n= 11 and *Tgfbr2*<sup>-/-</sup> d8, n=11. For non-stem, WT d0, n= 11, *Tgfbr2*<sup>-/-</sup> d0, n=11, WT d4, n= 13, *Tgfbr2*<sup>-/-</sup> d4, n=13, WT d8, n= 11 and *Tgfbr2*<sup>-/-</sup> d8, n=11. **(C)** The percentage of CD69<sup>+</sup> cells in stem-like (Left) and non-stem (Right) Pmel-1 T cells isolated from tumors at different time points after vaccination are shown. For stem-like, WT d0, n= 8, *Tgfbr2*<sup>-/-</sup> d0, n=8, WT d4, n= 10, *Tgfbr2*<sup>-/-</sup> d4, n=10, WT d8, n= 8 and *Tgfbr2*<sup>-/-</sup> d8, n=8. For non-stem, WT d0, n= 8, *Tgfbr2*<sup>-/-</sup> d0, n=8, WT d4, n= 10, *Tgfbr2*<sup>-/-</sup> d4, n=10, WT d8, n= 8 and *Tgfbr2*<sup>-/-</sup> d8, n=8. Pooled results from 3 independent experiments are shown. Data are presented as mean±SEM. Each symbol in (C) represents the results from an individual recipient mouse. Black symbols, WT and red symbols, *Tgfbr2*<sup>-/-</sup>. Indicated *p* values are calculated by Ordinary one-way ANOVA with Tukey's multi-comparison posttest. Two sided tests were used. Source data are provided as a Source Data file.



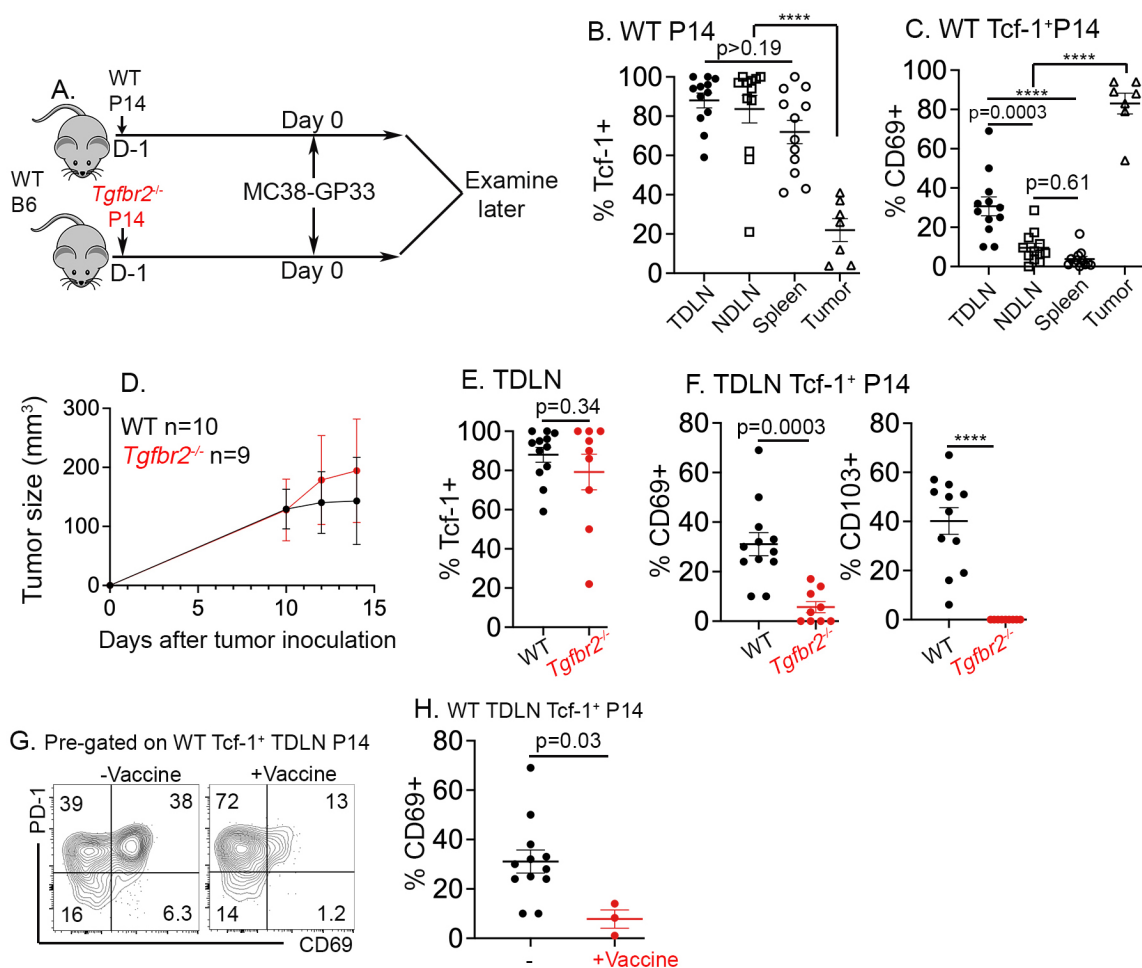

**Supplementary Figure 7. Colorectal tumor induces  $T_{RM}$  stem-like  $CD8^+$  T cell differentiation in TDLN.** (A) Experimental design. (B) The percentage of Tcf-1<sup>+</sup> cells in WT donor P14 T cells are shown. Filled circle, TDLN, empty square, NDLN, empty circle, spleen and empty triangle, tumor. (C) The percentage of CD69<sup>+</sup> cells in WT Tcf-1<sup>+</sup> P14 T cells are shown. For (B) and (C), TDLN, n=12, NDLN, n=12, Spleen, n=12 and Tumor, n=7. (D) Tumor growth (WT, n=10 and *Tgfb2<sup>-/-</sup>*, n=9). (E) The percentage of Tcf-1<sup>+</sup> cells in WT and *Tgfb2<sup>-/-</sup>* P14 T cells isolated from TDLN are shown (WT, n=12 and *Tgfb2<sup>-/-</sup>*, n=9). (F) The percentage of CD69<sup>+</sup> (left) and CD103<sup>+</sup> (right) in TDLN Tcf-1<sup>+</sup> P14 T cells are shown (WT, n=12 and *Tgfb2<sup>-/-</sup>*, n=9). (G) Representative FACS of pre-gated TDLN Tcf-1<sup>+</sup> P14 T cells before and 4 days after vaccination are shown. (H) The percentage of CD69<sup>+</sup> cells in Tcf-1<sup>+</sup> P14 T cells isolated from TDLN are shown (-Vaccine, n=12 and +Vaccine, n=3). Each symbol in (B to C) and (E, F, and H) represents the results from an individual mouse. For (D) to (F), black symbols, WT and red symbols, *Tgfb2<sup>-/-</sup>*. For (H), black symbols, no vaccine and red symbols, after vaccine. Data are presented as mean±SEM. Pooled results from 2 independent experiments are shown. Indicated p values and \*\*\*\*, p<0.0001 by Ordinary one-way ANOVA with Tukey's multi-comparison posttest. (B and C) or unpaired Student *t*-test (E to H). Two sided tests were used. Source data are provided as a Source Data file.

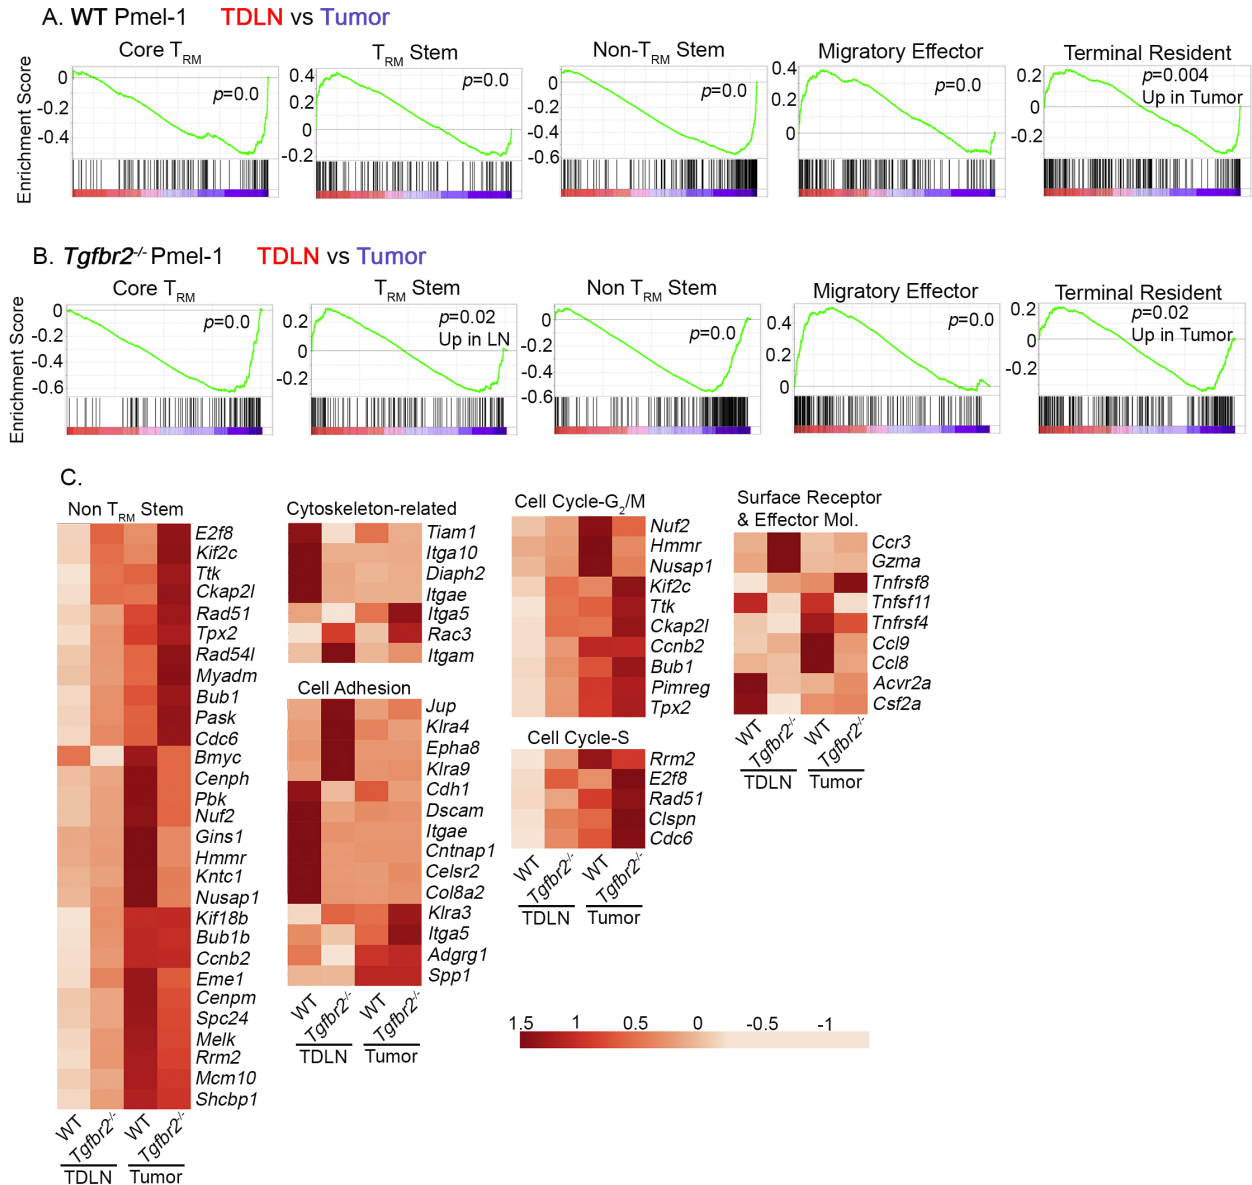

**Supplementary Figure 8. Enrichment of T<sub>RM</sub> signature genes in tumor.** GSEA results comparing TDLN (red) vs tumor (violet) samples. (A) WT and (B) *Tgfb2*<sup>-/-</sup> samples (C) Heatmap of DEGs for selected signature genes.
